# Supplementary material for: Role of serum complement C3 in blood–brain barrier injury and prognosis of anti-NMDAR encephalitis
Source: Research Square preprint supplement (doi:10.21203/rs.3.rs-7220180/v1), 2025-09-03
Supplement: Supplementary file 1 [file 899ee0ce8e7c3ac367334e4c.docx]

**Supplementary Table 1** Sensitivity analysis of poor prognosis in patients excluded autoimmune disease

|  | **Model I a** | | **Model II b** | |
| --- | --- | --- | --- | --- |
| **OR (95% CI)** | **P** | **OR (95% CI)** | **P** |
| C3 | 1.60 (1.07-2.39) | 0.023* | 1.75 (1.12-2.74) | 0.014* |
| Initial mRS | 2.42 (1.14-5.13) | 0.021* | 2.83 (1.19-6.72) | 0.018* |

OR, odds ratio; CI, confidence interval; mRS, modified Rankin scale.

a Model I was adjusted for age and gender; b Model II was adjusted for age, gender, C4, and Q-Alb.

*Statistically significant difference

**Supplementary Table 2** Sensitivity analysis of relapse in patients excluded autoimmune disease

|  | **Model I a** | | **Model II b** | |
| --- | --- | --- | --- | --- |
| **HR (95% CI)** | ***P*** | **HR (95% CI)** | ***P*** |
| C3 | 1.33 (1.05-1.68) | 0.020* | 1.35 (1.04-1.74) | 0.022* |
| Q-Albc | 1.12 (1.01-1.23) | 0.031* | 1.12 (1.01-1.24) | 0.032* |

HR, hazard ratio; CI, confidence interval

a Model I was adjusted for age and gender; b Model II was adjusted for age, gender, C4, and initial mRS; c Q-Alb is the ratio of CSF albumin to serum albumin

*Statistically significant difference

**Supplementary table 3** Stratification analysis of prognosis in patients with anti- NMDAR encephalitis.

| **Variables** | **N (%)** | **Poor prognosis**  ***P* for interaction** | | | **Relapse**  ***P* for interaction** | |
| --- | --- | --- | --- | --- | --- | --- |
| C3 | Initial mRS | C3 | | Q-Alb |
| Female | 39 (47.6) | 0.532 | 0.261 | 0.294 | | 0.595 |
| Male | 43 (52.4) |

anti-NMDAR, anti-N-methyl-d-aspartate receptor; mRS, modified Rankin scale.
