# Supplementary material for: Role of serum complement C3 in blood–brain barrier injury and prognosis of anti-NMDAR encephalitis
Source: Research Square preprint supplement (doi:10.21203/rs.3.rs-7220180/v1), 2025-09-03
Supplement: Supplementary file 2 [file bc70b889c60f3fa15438ca1d.xlsx]

## Sheet: Sheet1
ID	Gender	Age of onset	Age of onset	relapse	Interval time	follow-up time	Smoking	Drinking	Hypertension	Diabetes	Cerebrovascular disease	Autoimmune diseases	Tumor	Initial mRS	Initial mRS	C3, g/dL	C4, g/dL	CSF IgG (mg/L)	serum IgG (g/L)	Q-IgG	CSF albumin (mg/L)	serum albumin (g/L)	Q-Alb	QALB	IgG index	Prodrome	Consciousness disorders	Speech dysfunction	Mental and behavioral abnormalities	Cognitive dysfunction	Seizures	Movement disorders	Sleep dysfunction	Involuntary movements	Autonomic dysfunction	Serum anti-NMDAR antibody	CSF WCC(*106/L)	Pressure	Protein（g/L)	Glucose(mmol/L)	Chloride（mmol/L)	serum WCC	Neutrophil	Lymphocytes	Monocytes	Abnormal head-MRI	Brainstem	Cerebellum	Cerebral lobes and sulcus
1	0	17	0	0	37.93	37.93	0	0	0	0	0	0	0	1	0	7.53	1.71	12.8	28.8	0.444444	100	51	1.96078	0	0.226667	0	0	0	1	1	0	0	0	0	0	0	6	180	0.44	3.16	130	3.42	2.06	1.06	0.2	1	1	0	0
2	1	26	1	0	55.77	55.77	0	0	0	0	0	0	0	4	1	6.02	1.78	42.4	31.7	1.33754	78	39.5	1.97468	0	0.677344	0	1	1	1	0	0	0	0	0	0	1	100	145	0.31	3.52	126	5.78	4.79	0.7	0.27	0	0	0	0
3	1	15	0	0	29	29	0	0	0	0	0	0	0	1	0	8.87	2.53	39.2	24.8	1.58065	92.1	44.2	2.08371	0	0.758572	0	0	0	1	1	1	0	0	1	0	0	22	165	0.25	2.78	127	16.4	13.12	2.1	1.1	0	0	0	0
4	1	21	1	0	27.17	27.17	0	0	0	0	0	0	0	1	0	9.8	2.1	26	18.67	1.39261	89.6	40.75	2.19877	0	0.633357	1	1	0	1	0	1	1	0	1	0	1	98	350	0.4	2.26	130.2	19.65	18.25	0.83	0.57	1	0	0	1
5	0	27	1	0	23	23	1	0	0	0	0	0	0	3	0	9.5	2.2	24.6	20.572	1.1958	95.8	43.19	2.21811	0	0.539109	1	1	1	1	0	0	0	0	0	0	0	26	135	0.29	2.97	127.9	7.58	4.75	2.34	0.47	0	0	0	0
6	1	52	1	0	17.47	17.47	0	0	0	0	0	0	0	1	0	8.8	2.4	22.6	12.487	1.80988	93.1	40.98	2.27184	0	0.796659	0	1	1	0	0	1	0	0	0	0	1	6	220	0.24	3.96	125	14.56	10.82	2.92	0.73	1	0	0	0
7	1	17	0	1	30.4	33.2333	0	0	0	0	0	0	0	2	0	11.5	1.86	38	13.4	2.83582	87.6	37.5	2.336	0	1.21396	0	0	0	1	1	0	1	0	0	0	0	2	125	0.62	2.78	124	5.1	2.9	1.5	0.39	1	0	0	1
8	0	12	0	0	40.13	40.13	1	0	0	0	0	0	0	3	0	9.4	2.1	13.5	9.23	1.46262	118.6	48.7	2.43532	0	0.600588	0	0	0	0	1	1	0	0	0	0	1	20	190	0.19	4.33	126.2	4.95	3.27195	1.15	0.47	1	0	0	0
9	0	41	1	0	39.0333	39.03	0	0	0	0	0	0	0	3	0	9.6	2.8	27.8	8.514	3.26521	89.5	36.74	2.43604	0	1.34038	1	0	1	0	0	0	0	0	0	0	1	6	145	0.38	4.83	118	10.51	9.71	0.58	0.21	1	0	0	1
10	0	15	0	0	16.53	16.53	1	0	0	0	0	0	0	1	0	11.9	4.03	69.1	33.6	2.05655	103.2	39.2	2.63265	0	0.781169	0	1	1	1	1	1	1	1	1	0	0	8	145	0.19	4.39	135.5	14.47	13.47	0.51	0.48	1	0	0	0
11	1	33	1	0	18.1	18.1	0	0	0	0	0	0	0	1	0	10.9	1.6	44.2	10.747	4.11278	110.8	41.33	2.68086	0	1.53412	0	0	0	0	1	0	0	0	0	0	1	56	150	0.87	3.44	121	4.07	1.98	1.69	0.3	1	0	0	1
12	1	27	1	0	16.4	16.4	0	0	0	0	0	1	0	1	0	12.1	2.9	34.4	17.2	2	105	38.4	2.73438	0	0.731429	0	0	0	0	0	0	0	0	0	0	1	2	180	0.18	2.55	127.6	5.29	3.69	1.22	0.32	1	0	0	0
13	1	13	0	0	12.23	12.23	0	0	0	0	0	0	0	3	0	10.3	1.6	24.4	11.6	2.10345	114.9	40.6	2.83005	0	0.743255	0	0	0	1	0	0	0	1	0	0	1	10	300	0.32	5.96	123	11.18	9.02	1.24	0.81	0	0	0	0
14	1	17	0	0	14.53	14.53	0	0	0	0	0	0	0	3	0	10.4	3.6	23.4	16.494	1.4187	108.3	38.17	2.83731	0	0.500016	0	0	0	0	0	0	0	0	0	1	1	0	122	0.7	4.91	107	10.14	7.81	1.75	0.56	1	0	0	1
15	0	16	0	0	27.97	27.97	0	0	0	0	0	0	0	1	0	13	2.7	25.3	12.6	2.00794	144	50.6	2.84585	0	0.705567	1	1	1	1	1	0	1	1	0	1	0	8	145	0.26	3.42	128	9.7	6.6	2.2	0.93	0	0	0	0
16	0	53	1	0	68.03	68.03	0	0	0	0	0	0	0	2	0	11.9	2.68	41.6	25.9	1.60618	114	38.4	2.96875	0	0.541028	0	0	1	1	1	0	0	0	0	0	1	2	215	0.27	3.02	124.1	8.48	5.03712	2.51	0.73	1	0	0	1
17	0	46	1	0	22.93	22.93	0	1	1	0	0	0	0	3	0	14.2	1.9	17.9	10.6	1.68868	124.8	40.9	3.05134	0	0.553421	1	1	1	1	0	1	0	0	0	1	0	18	105	0.71	3.71	122.2	6.6	5.2	0.6	0.37	0	0	0	0
18	1	21	1	1	44.53	48.7	0	0	0	0	0	0	0	1	0	9.5	1.2	24.387	6.793	3.59002	126.2	41.24	3.06014	0	1.17316	0	0	1	1	0	1	0	0	1	0	1	2	150	0.2	3.87	125.1	8.39	6.19	1.51	0.63	0	0	0	0
19	0	18	1	0	12.8	12.8	0	0	0	0	0	0	0	1	0	9.3	2.6	26.4	6.529	4.0435	135.9	43.98	3.09004	0	1.30856	0	1	0	0	1	0	0	0	0	0	0	2	125	0.44	4.33	128	6.64	3.09	3.11	0.33	1	1	0	1
20	0	32	1	0	55.4	55.4	0	1	0	0	0	0	0	4	1	13.6	4.1	37.3	30.008	1.243	111.5	35.82	3.11279	0	0.399321	0	1	1	1	1	0	0	1	0	1	0	5	190	0.21	4.31	125.2	6.69	4.03407	2.06	0.48	1	0	0	0
21	0	18	1	1	7.43	57.8	1	1	0	0	0	0	0	4	1	12.8	2.8	19.9	10.619	1.874	144	45.81	3.14342	0	0.596166	0	1	1	1	1	0	0	1	0	1	1	0	80	0.28	2.78	129	3.5	0.091	0.5	0.28	0	0	0	0
22	1	13	0	0	76.9	76.9	0	0	0	0	0	0	0	3	0	8.9	1.9	137	13.2	10.3788	148.6	45.8	3.24454	0	3.19885	0	0	1	1	0	0	0	1	0	0	1	12	150	0.2	2.56	127.3	9.8	5.5	3.62	0.56	1	0	0	0
23	0	15	0	0	40.2667	40.27	1	0	0	0	0	0	1	1	0	7.5	0.9	15.2	10.034	1.51485	117.6	36.2	3.24862	0	0.466306	1	0	0	0	1	0	1	0	0	0	0	20	140	0.26	3.42	127.2	7.1	5.1901	1.32	0.5	1	1	1	0
24	0	45	1	0	21.13	21.13	1	0	0	1	0	0	0	4	1	13.5	2.9	26.1	8.642	3.02013	158.7	48.37	3.28096	0	0.920503	0	1	1	1	0	1	0	1	1	0	0	6	190	0.18	5	125.9	9.18	8.18856	0.76	0.21	0	0	0	0
25	1	25	1	0	42.93	42.93	0	0	0	0	0	0	0	3	0	9.5	2.4	20.3	7.68	2.64323	152.9	44.3	3.45147	0	0.765828	1	0	1	1	0	0	0	0	0	0	1	4	310	0.31	2.78	120	7	4.4	2	0.64	0	0	0	0
26	1	31	1	1	3.3	61.5333	0	0	0	0	0	0	0	3	0	14.1	3.1	35.1	11.6	3.02586	142.5	41.2	3.45874	0	0.874846	1	0	0	0	1	0	0	1	1	0	0	10	110	0.69	2.23	122.3	4.8	2.3	2.1	0.3	1	0	0	1
27	1	24	1	0	66.33	66.33	0	0	0	0	0	0	0	2	0	10.4	1.7	33.1	11.5	2.87826	161.7	45.8	3.53057	0	0.81524	1	0	1	1	1	1	0	1	1	0	1	18	120	0.18	2.98	127.7	11.52	10.25	0.74	0.51	1	0	0	1
28	1	18	1	0	12.3	12.3	0	0	0	0	0	0	0	1	0	7.9	2	17	10.4	1.63462	150.4	42	3.58095	0	0.456475	0	1	1	1	0	0	0	1	0	0	1	6	140	0.42	3.07	126	7.9	5.31	1.99	0.51	1	0	0	1
29	1	33	1	0	15.9	15.9	0	0	0	0	0	0	0	4	1	16.6	3.03	22	10.1	2.17822	144	39.6	3.63636	0	0.59901	1	1	1	1	1	0	0	1	0	0	1	18	155	0.34	3.49	140.7	7.13	3.13007	3.52	0.28	0	0	0	0
30	1	43	1	0	40.0667	40.07	0	0	0	0	0	0	0	4	1	8.5	2.5	19.4	6.8	2.85294	133	36.4	3.65385	0	0.780805	0	0	1	1	0	0	1	0	0	1	1	2	130	0.89	3.85	129.1	8.16	4.9	2.51	0.5	1	0	0	1
31	1	53	1	0	22.4333	22.43	0	0	0	0	0	1	0	2	0	13.4	2.31	21.4	13	1.64615	160	43	3.72093	0	0.442404	0	0	0	1	0	1	0	0	0	0	0	6	185	0.18	3	129.5	7.32	5.38	1.19	0.72	1	0	0	1
32	0	65	1	0	45.5	45.5	0	1	0	0	0	0	1	2	0	8.45	2.33	51.1	8.49	6.01885	143	36.6	3.9071	0	1.54049	0	0	1	0	1	0	0	0	0	0	1	166	330	0.48	4.03	126	9.64	7.06	2.14	0.35	1	0	0	1
33	1	19	1	0	82.93	82.93	0	0	0	0	0	0	0	2	0	6.2	2	32.4	11.3	2.86726	153.7	38.8	3.96134	0	0.72381	1	0	0	1	1	0	0	0	0	0	1	4	150	0.34	3.44	127.1	5.8	3.63	1.56	0.54	0	0	0	0
34	1	14	0	0	77.4	77.4	0	0	0	0	0	0	0	1	0	9.6	2.55	62.689	13.9	4.51	188.55	45	4.19	0	1.07637	1	1	1	1	1	1	0	0	1	0	0	24	200	0.21	5.28	128.9	13.1	12.37	0.54	0.18	0	0	0	0
35	1	41	1	0	80.1	80.1	0	0	0	0	0	0	0	1	0	14.6	2.64	25.9	10.2	2.53922	172	40.4	4.25743	0	0.59642	1	0	1	0	1	1	0	0	0	1	1	8	317	0.23	3.33	115.9	17.9	15.88	1.49	0.48	1	0	0	1
36	0	43	1	1	6.13	46.7	0	0	0	0	0	0	0	1	0	9	2.9	22.5	5.774	3.89678	166	38.66	4.29384	0	0.907527	0	0	1	1	1	1	0	1	1	0	0	36	120	0.33	2.78	122	10.2	8.0682	1.7	0.39	1	0	0	0
37	0	53	1	0	15.73	15.73	1	1	0	0	0	0	0	4	1	10.9	2.3	177.8	13.242	13.427	203.9	47.11	4.32817	0	3.10223	0	0	0	1	0	1	0	0	0	0	0	20	270	0.56	3.64	124.6	6.8	4.83	1.02	0.74	0	0	0	0
38	1	44	1	0	30.3	30.3	0	0	0	0	0	0	0	4	1	13.2	2.76	74.8	5.83	12.8302	177	39.8	4.44724	0	2.88498	1	0	0	1	1	1	0	0	1	0	0	4	350	0.22	3.36	126.7	10.31	7.65002	2.05	0.58	0	0	0	0
39	1	17	0	0	56.67	56.67	0	0	0	0	0	0	0	3	0	12	1.5	43.3	9.66	4.4824	222.8	48.6	4.58436	0	0.977759	1	1	1	1	0	0	0	0	0	0	1	6	160	0.37	3.52	131	5.91	3.63	1.97	0.29	1	1	0	1
40	0	17	0	0	41.6	41.6	0	1	0	0	0	0	0	4	1	13.7	3.4	56.16	14.4	3.9	203	43.5	4.66667	0	0.835714	1	0	1	0	0	0	0	0	0	0	0	4	130	0.28	2.77	123	14.04	6.96	2.39	0.63	1	0	0	0
41	1	54	1	0	35.57	35.57	0	0	0	0	0	0	0	1	0	11	2.47	51.9	10.8	4.80556	195	41.7	4.67626	0	1.02765	1	0	0	1	0	0	0	0	0	0	1	4	110	0.57	3.38	125.1	4.4	2.74	1.1	0.43	1	0	0	1
42	1	32	1	0	37.5	37.5	0	0	0	0	0	0	0	1	0	9.69	1.92	29.4	12.4	2.37097	142	30.2	4.70199	1	0.504248	1	0	0	1	0	0	0	1	0	0	0	8	210	0.27	3.09	126.8	5.14	3.24	1.51	0.34	1	0	0	1
43	0	38	1	0	41.43	41.43	0	0	0	0	0	0	1	4	1	10.4	1.7	62.4	15.4	4.05195	195	40.2	4.85075	1	0.835325	0	1	1	1	1	0	0	1	1	0	1	16	160	0.46	4.19	129.4	3.91	2.54	0.89	0.43	1	0	0	1
44	1	29	1	0	37.6333	37.63	0	0	0	0	0	0	0	3	0	6.2	1.1	115	9.938	11.5717	193.6	39.8	4.86432	1	2.3789	0	0	0	1	0	0	0	0	0	0	1	8	100	0.39	4.71	125	6.51	5.78	0.58	0.14	1	0	0	1
45	1	47	1	0	13.6	13.6	0	0	0	0	0	0	0	4	1	9.4	2.32	32.8	9.08	3.61233	176.1	34.2	5.14912	1	0.701544	0	0	1	1	0	0	0	0	0	0	0	58	350	0.45	2.91	119	18.1	11.73	4.53	1.81	1	0	0	1
46	1	29	1	1	1.97	66.0333	0	0	0	0	0	0	0	3	0	13.9	4.4	59.09	13.969	4.23008	247.4	47.7	5.18658	1	0.815581	0	0	0	1	1	0	0	0	0	0	1	6	75	0.82	4.08	124.9	4.7	2.58	1.79	0.24	1	0	0	1
47	1	78	1	0	62.5	62.5	0	0	1	0	1	1	0	1	0	5.11	0.79	41.8	15	2.78667	132	25.3	5.21739	1	0.534111	1	1	1	1	0	0	1	0	0	0	1	160	326	0.78	2.61	123	8.17	5.6	1.89	0.6	1	0	0	1
48	0	50	1	0	22.97	22.97	0	0	0	0	0	0	0	2	0	9.7	2.9	41.9	11.188	3.74508	223.9	42.21	5.30443	1	0.706029	0	0	0	1	1	0	0	0	0	0	1	4	150	0.22	5.34	123	7.37	5.94	1.01	0.37	0	0	0	0
49	1	14	0	0	20.03	20.03	0	0	0	0	0	0	0	4	1	9.7	1.7	34.3	7.443	4.60836	251.6	43.15	5.83082	1	0.790344	1	0	1	0	1	0	0	0	0	0	0	2	120	0.44	4.09	130.2	8.41	5.16	2.34	0.68	1	0	0	1
50	0	72	1	1	5.17	25.7	1	1	0	0	0	0	0	3	0	9.36	1.6	38.5	12.9	2.9845	236	39.3	6.00509	1	0.496994	1	1	1	1	1	1	0	0	1	0	0	100	350	1.04	2.79	126.6	10.9	8.1	1.33	1.29	1	0	1	0
51	1	15	0	1	35.13	56.6333	0	0	0	0	0	0	0	3	0	10	2.4	25.4	5.54	4.58484	195.3	31.97	6.10885	1	0.750524	0	0	0	0	0	0	0	0	0	0	0	40	400	1.24	2.57	129.4	8.7	6.15	1.84	0.52	0	0	0	0
52	0	35	1	0	32.17	32.17	0	0	0	0	0	0	0	4	1	11.5	3.4	37.5	9.45	3.96825	304.1	49.4	6.15587	1	0.644629	1	0	0	0	1	0	0	0	0	0	0	4	150	0.71	4.36	120.5	6.91	4.51	1.56	0.43	1	0	0	1
53	0	53	1	0	34.73	34.73	1	0	1	0	1	0	0	5	1	12.3	0.9	41.7	10.7	3.8972	271	41.2	6.57767	1	0.592489	1	0	0	1	0	1	0	0	1	0	0	82	50	0.15	2.28	125	9.26	7.04	1.17	0.81	1	0	0	0
54	0	36	1	0	24.23	24.23	1	1	0	0	0	0	0	4	1	14.5	4.6	67	13.305	5.0357	291.8	41.97	6.95259	1	0.724292	0	1	1	1	0	0	0	0	0	0	1	86	100	0.34	2.1	128	11.72	9.46	1.4	0.81	1	0	0	1
55	0	34	1	1	13.93	36.9	1	0	0	0	0	0	0	3	0	13.2	2.4	31.2	6.51	4.79263	290	41.7	6.95444	1	0.689147	1	1	1	1	0	0	0	1	0	0	1	12	130	0.33	2.25	124.9	6.6	4.6	1.6	0.34	1	0	1	0
56	0	57	1	0	37.7667	37.77	0	0	1	0	0	0	1	3	0	10.7	4.1	54.3	9.172	5.92019	246.9	34.55	7.14616	1	0.828443	0	1	1	1	1	0	0	1	0	0	1	8	163	0.33	3.76	128	12.74	10.86	1.37	0.5	0	0	0	0
57	1	44	1	0	41.57	41.57	0	0	0	0	0	0	0	3	0	12.5	3.1	51.8	9.36	5.53419	261	36.4	7.17033	1	0.771818	0	0	1	1	0	1	0	1	0	0	1	120	265	0.99	2.56	125	15.93	13.79	1.58	0.55	0	0	0	0
58	0	36	1	1	21	86.3333	1	0	0	0	0	1	0	1	0	7.6	1.52	39.933	15.3	2.61	260.5	35.9	7.25627	1	0.359689	0	1	0	0	1	0	1	0	0	0	1	2	122	0.43	3.86	122	21.28	17.39	2.27	1.16	1	1	1	1
59	1	32	1	0	24.23	24.23	0	0	0	0	0	1	0	2	0	10	3.44	65	30.5	2.13115	290	38.2	7.59162	1	0.280724	0	0	0	1	0	1	0	0	0	1	0	144	200	0.36	2.94	126.7	7.7	6.05	0.76	0.7	0	0	0	0
60	0	38	1	0	29	29	1	0	0	0	0	0	0	2	0	8.79	2.36	229	8.6	26.6279	288	37.6	7.65957	1	3.47642	0	1	1	1	1	1	1	0	1	0	0	50	270	0.17	3.95	129.9	11.9	7.5089	3.27	1.02	0	0	0	0
61	0	46	1	0	62.33	62.33	1	1	0	0	0	0	0	3	0	9.6	2.4	22	13.2	1.66667	322.2	41.8	7.70813	1	0.216222	1	0	1	1	1	0	0	0	0	1	0	21	170	0.38	4.43	118.3	15.38	13.2	1.4	0.78	0	0	0	0
62	1	22	1	1	42	72.4	0	0	0	0	0	0	0	4	1	15.5	3.1	74	9.53	7.76495	310.9	38.9	7.99229	1	0.971556	0	0	1	0	0	1	1	0	1	0	0	160	180	0.58	4.65	125	12.93	8.87	2.88	1.06	1	0	0	1
63	0	27	1	0	30.23	30.23	1	1	0	0	0	0	0	3	0	10.4	3.1	51.1	9.651	5.29479	386.8	47.83	8.08697	1	0.65473	0	1	0	0	0	1	0	0	0	0	1	10	160	0.43	4.28	123	6.33	4.79	1.05	0.3	1	0	0	1
64	1	29	1	0	48.67	48.67	0	0	0	0	0	0	0	0	0	10.1	2.5	58.8	8.68	6.77419	276.9	34.2	8.09649	1	0.836683	1	1	1	1	1	0	1	1	1	0	0	56	240	0.55	2.1	126.8	13.9	11.71	1.28	0.71	1	0	0	0
65	0	48	1	0	55.7	55.7	1	1	0	0	0	0	0	2	0	11.1	1.96	31.3	23.6	1.32627	296	36.5	8.10959	1	0.163544	0	0	0	0	1	1	0	0	0	0	1	2	270	0.56	3.91	124	6.5	4.16	1.57	0.61	1	0	0	1
66	0	36	1	1	14.17	27.7667	0	1	0	0	0	0	1	2	0	13.4	2.86	37.1	10.6	3.5	345	40.1	8.60349	1	0.406812	1	0	1	1	1	0	0	0	0	0	1	4	100	0.37	8.34	129	8.8	5.91	2.35	0.34	1	0	0	1
67	0	37	1	0	42.93	42.93	1	1	0	0	0	0	0	3	0	14.2	2.8	59.6	7.36	8.09783	421.2	42.5	9.91059	1	0.817088	0	0	1	0	1	0	0	0	0	0	0	32	150	0.87	3.3	124	8.77	5.65	2.52	0.38	1	0	0	0
68	0	28	1	0	56.97	56.97	0	0	0	0	0	0	0	5	1	9.2	2.1	91.3	6.96	13.1178	486.2	46.6	10.4335	1	1.25728	1	1	0	1	1	1	0	1	0	0	0	9	180	0.42	2.84	126.4	6.23	4.41	1.22	0.49	0	0	0	0
69	0	45	1	1	25.03	55.4333	0	1	1	1	0	0	0	4	1	11.8	2.8	64.7	8.666	7.46596	466.5	43.69	10.6775	1	0.699223	1	1	1	1	1	1	0	1	1	0	1	132	250	0.32	4.03	128.1	11.01	9.33	0.94	0.72	1	0	0	0
70	0	71	1	0	39.47	39.47	1	0	1	1	1	0	0	2	0	8.9	0.98	79.5	17	4.67647	434	40.5	10.716	1	0.436399	0	0	1	1	0	0	0	0	0	0	1	122	190	0.84	3.33	133	10.86	9.13	1.18	0.48	1	0	0	1
71	0	21	1	0	25.57	25.57	1	0	0	0	0	0	0	2	0	11.2	2.1	106.7	8.401	12.7009	498.6	46.09	10.818	1	1.17405	1	0	1	1	0	1	0	0	0	1	1	4	150	0.31	4.56	130.4	13.75	11.33	1.4	1.02	0	0	0	0
72	0	34	1	0	35.63	35.63	0	0	1	0	0	0	0	4	1	10.8	2.8	70.5	7.969	8.84678	360	31.6	11.3924	1	0.776551	1	0	0	1	1	1	0	0	1	0	1	32	170	0.29	2.4	126.6	10	7.28	1.86	0.76	1	0	1	1
73	1	39	1	0	18.2	18.2	0	0	0	0	0	0	0	5	1	11.3	3.56	66.6	9.75	6.83077	441	37.4	11.7914	1	0.579299	0	0	0	0	0	1	0	0	0	0	0	42	360	0.41	2.44	123.8	10.3	8.15	1.45	0.64	1	0	0	1
74	0	32	1	1	8.73	39.1333	0	1	0	0	0	0	0	5	1	13.3	3.5	124.4	11.864	10.4855	596.9	44	13.5659	1	0.77293	0	1	0	0	0	0	0	0	0	0	0	80	210	0.26	2.94	124.7	6.6	4.3	1.7	0.48	1	0	0	1
75	0	34	1	0	12.1	12.1	1	0	0	0	0	1	0	4	1	13.5	2.1	93.2	10.53	8.8509	659.7	48.6	13.5741	1	0.652045	1	0	0	1	1	1	0	1	0	0	0	390	225	0.66	2.75	127	8.9	5.89	2.18	0.78	1	0	0	1
76	1	36	1	0	32.87	32.87	0	0	0	0	0	0	0	3	0	11.8	4	94	8.785	10.7001	828.1	60.15	13.7672	1	0.777211	0	0	0	1	1	0	0	1	0	0	0	2	200	0.23	4.62	124.8	19.83	16.28	1.84	1.71	0	0	0	0
77	1	27	1	0	92.13	92.13	0	0	0	0	0	0	0	4	1	12.3	2.71	92.1	10.6	8.68868	578	41.7	13.8609	1	0.626848	0	0	1	1	1	0	0	1	0	0	0	60	190	0.61	3.19	120.1	8.9	6.72	1.35	0.7	1	1	0	1
78	0	50	1	1	15.23	45.6333	1	1	1	0	0	0	0	1	0	14.7	1.5	81.3	8.73	9.31271	619.9	44.37	13.9712	1	0.666567	0	0	0	1	0	0	0	0	0	0	0	96	285	0.45	4.95	139	7.18	4.62	2.06	0.45	0	0	0	0
79	0	39	1	1	13.8	33.8	0	0	0	0	0	0	0	4	1	13.6	2.7	85.6	33.2	2.57831	613	40.6	15.0985	1	0.170766	0	0	0	0	0	0	0	0	0	0	0	2	120	0.94	3.68	125.4	6.64	4.42	1.57	0.58	1	0	0	1
80	0	54	1	1	37.53	37.5333	0	0	0	0	0	0	0	2	0	13.5	3.41	86.4	9.79	8.82533	634	36.4	17.4176	1	0.506691	0	1	0	1	0	1	1	0	0	0	0	110	160	0.89	4.38	130	7.25	6.43	0.56	0.25	0	0	0	0
81	1	55	1	1	3.7	76.0667	0	0	0	0	0	1	0	3	0	15.1	2.11	106	9.06	11.6998	513	28.5	18	1	0.649988	1	0	0	1	1	0	0	1	0	0	0	100	350	0.46	3.27	124.5	20.2	18.5436	1.01	0.65	1	0	0	1
82	0	27	1	1	13.6	74	1	0	0	0	0	0	0	5	1	11.5	3.2	106	7.36	14.4022	787	34.9	22.5501	1	0.638673	0	1	0	1	0	0	0	0	0	0	1	94	245	0.32	3.61	132	15.51	13.82	1.07	0.6	1	0	0	1
[truncated: 14 more columns]
